# Supplementary material for: Relation between Photogrammetry and Spinal Mouse for Lumbopelvic Assessment in Adolescents with Thoracic Kyphosis
Source: MDPI journal article supplement (doi:10.3390/healthcare12070738), 2024-03-28
Supplement: s1 [file s1]

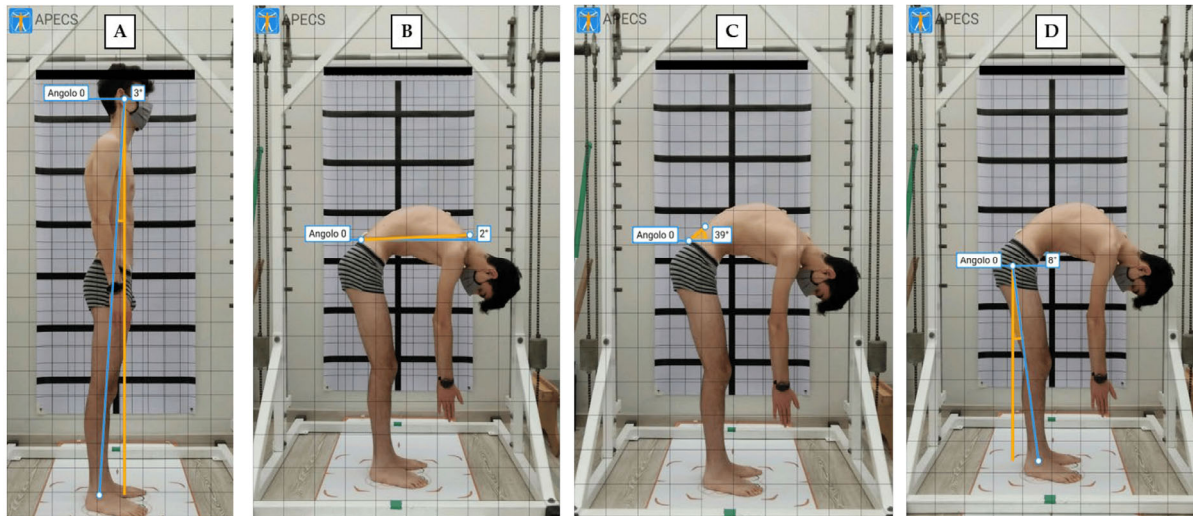

**Figure S1.** Photogrammetry evaluation in both standing and bending positions. Note: This figure is adapted from Belli et al., 2023 [19].
