# Supplementary figures and images for: Relation between Photogrammetry and Spinal Mouse for Lumbopelvic Assessment in Adolescents with Thoracic Kyphosis
Source: MDPI journal article supplement (doi:10.3390/healthcare12070738), 2024-03-28

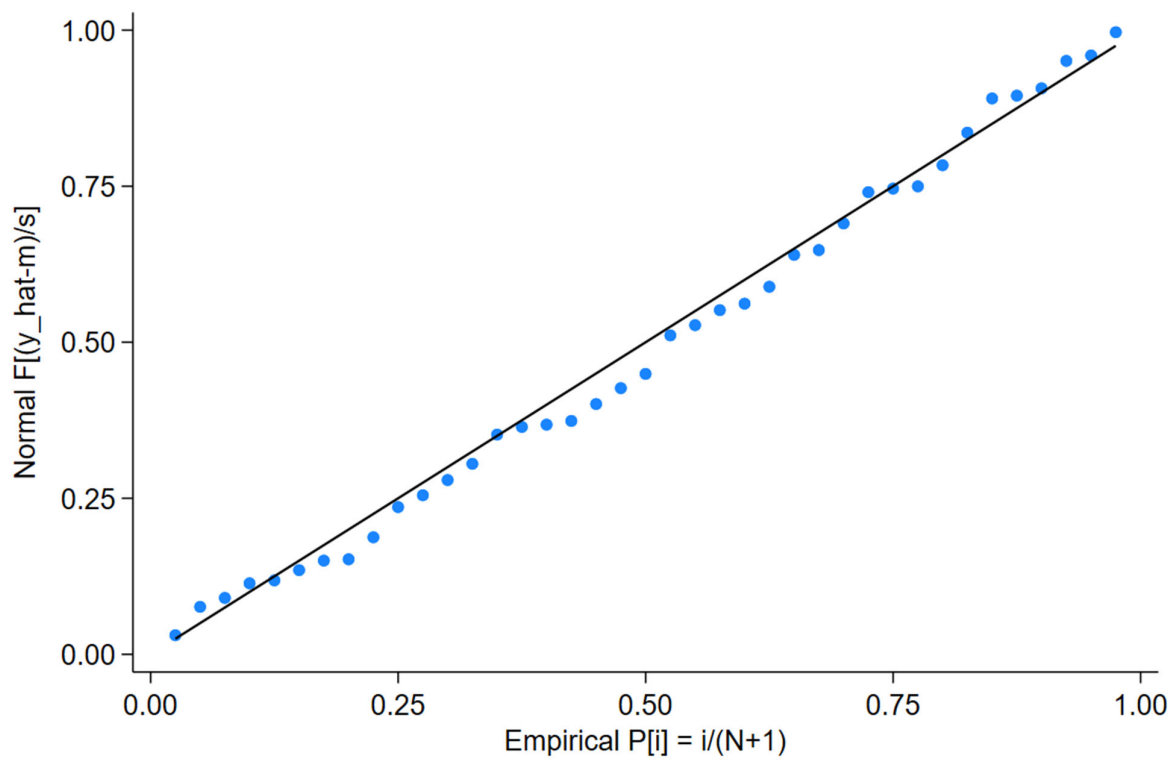

**Figure S2.** Q-Q plot of model residuals.

Supplement: s1 [file s1]
